# Supplementary material for: Robustness of Nutrient Signaling Is Maintained by Interconnectivity Between Signal Transduction Pathways
Source: Front Physiol. 2019 Jan 21;9:1964. doi: 10.3389/fphys.2018.01964 (PMC6348271; doi:10.3389/fphys.2018.01964)
Supplement: Supplementary file 1 [file Data_Sheet_1.pdf]

# Supplementary: Robustness of nutrient signalling is maintained by inter- connectivity between signal transduction pathways

**Niek Welkenhuysen**<sup>1,2\*</sup>, **Barbara Schnitzer**<sup>1,2</sup>, **Linnea Österberg**<sup>1,2,3</sup> and **Marija Cvijovic**<sup>1,2\*</sup>

<sup>1</sup>*Department of Mathematical Sciences, University of Gothenburg, Gothenburg, Sweden*

<sup>2</sup>*Department of Mathematical Sciences, Chalmers University of Technology, Gothenburg, Sweden*

<sup>3</sup>*Department of Biology and Biological Engineering, Chalmers University of Technology, Gothenburg, Sweden*

Correspondence\*:

Marija Cvijovic  
marija.cvijovic@chalmers.se

Niek Welkenhuysen  
niek@chalmers.se

| Strain name | background | genotype                                       | sources                |
|-------------|------------|------------------------------------------------|------------------------|
| Rgt1-GFP    | BY4741     | MATa RGT1-GFP HIS3-MX6                         | [5]                    |
| YSH2350     | BY47XX     | MATa MSN2-GFP-HIS3 NRD1-mCherry-hphNT1 MET LYS | S. Hohmann collection  |
| MCY14       | W303-1A    | NRD1-mCherry- Hph MIG1-GFP-KanMX               | M. Cvijovic collection |
| YSH2796     | W303-1A    | MATa TUP1-mCherry-HPH                          | S. Hohmann collection  |
| YSH2797     | W303-1A    | MATa SSN6-mCherry-HPH                          | S. Hohmann collection  |

**Table S1. List of all strains and plasmids used in this study.** BY47XX is the haploid strain from the cross between BY4741 and BY4742

| Protein/Metabolite | Identifier in model | component type |
|--------------------|---------------------|----------------|
| Glc                | Metabolites{1, : }  | Metabolite     |
| ATP                | Metabolites{2, : }  | Metabolite     |
| cAMP               | Metabolites{3, : }  | Metabolite     |
| Snf1               | Snf1pw{1, : }       | Protein        |
| Reg1               | Snf1pw{2, : }       | Protein        |
| Glc7               | Snf1pw{3, : }       | Protein        |
| Sak1               | Snf1pw{4, : }       | Protein        |
| Tos3               | Snf1pw{5, : }       | Protein        |
| Elm1               | Snf1pw{6, : }       | Protein        |
| Sip1               | Snf1pw{7, : }       | Protein        |
| Sip2               | Snf1pw{8, : }       | Protein        |
| Gal83              | Snf1pw{9, : }       | Protein        |
| Snf4               | Snf1pw{10, : }      | Protein        |
| Mig1               | Snf1pw{11, : }      | Protein        |
| Rgt2               | R2S3pw{1, : }       | Protein        |
| Snf3               | R2S3pw{2, : }       | Protein        |
| Yck1               | R2S3pw{3, : }       | Protein        |
| Yck2               | R2S3pw{4, : }       | Protein        |
| Mth1               | R2S3pw{5, : }       | Protein        |
| Std1               | R2S3pw{6, : }       | Protein        |
| Rgt1               | R2S3pw{7, : }       | Protein        |
| Pph3               | R2S3pw{8, : }       | Protein        |
| Psy2               | R2S3pw{9, : }       | Protein        |
| Gpr1               | PKApw{1, : }        | Protein        |
| Gpa2               | PKApw{2, : }        | Protein        |
| Ras1               | PKApw{3, : }        | Protein        |
| Ras2               | PKApw{4, : }        | Protein        |
| Cdc25              | PKApw{5, : }        | Protein        |
| Sdc25              | PKApw{6, : }        | Protein        |
| Ira1               | PKApw{7, : }        | Protein        |
| Ira2               | PKApw{8, : }        | Protein        |
| Cyr1               | PKApw{9, : }        | Protein        |
| Tpk1               | PKApw{10, : }       | Protein        |
| Tpk2               | PKApw{11, : }       | Protein        |
| Tpk3               | PKApw{12, : }       | Protein        |
| Bcy1               | PKApw{13, : }       | Protein        |
| Rim15              | PKApw{14, : }       | Protein        |
| Yak1               | PKApw{15, : }       | Protein        |
| Msn2               | PKApw{16, : }       | Protein        |
| Msn4               | PKApw{17, : }       | Protein        |
| Gis1               | PKApw{18, : }       | Protein        |

| Protein/Metabolite | Identifier in model | component type    |
|--------------------|---------------------|-------------------|
| HXTs               | Misc1{1, : }        | Multiple proteins |
| Ssn6               | Misc1{2, : }        | Protein           |
| Tup1               | Misc1{3, : }        | Protein           |
| Xxx1               | Misc1{4, : }        | Protein           |
| Xxx2               | Misc1{5, : }        | Protein           |
| Xxx3               | Misc1{6, : }        | Protein           |
| Xxx4               | Misc1{7, : }        | Protein           |

**Table S2. Glucose signalling model components.** Table with all components, their model identifier and type of component.

| Protein state            | position in vector | possible states                                                                                        |
|--------------------------|--------------------|--------------------------------------------------------------------------------------------------------|
| protein name             | XXXpw{ : , 1 }     |                                                                                                        |
| presence                 | XXXpw{ : , 2 }     | (0) protein not present in system<br>(1) protein present in system                                     |
| localization in the cell | XXXpw{ : , 3 }     | (0) in or near cell membrane<br>(1) in cytosol<br>(2) in nucleus                                       |
| phosphorylation status   | XXXpw{ : , 4 }     | (0) phosphorylation site not phosphorylated<br>(1) phosphorylation site phosphorylated                 |
| guanylation status       | XXXpw{ : , 5 }     | (0) no guanylation sites<br>(1) guanylation site bound with GDP<br>(2) guanylation site bound with GTP |
| DNA binding status       | XXXpw{ : , 6 }     | (0) protein is not DNA bound<br>(1) protein is DNA bound                                               |

**Table S3. Protein component vector states:** all position in the vector for protein components. Their model identifier in MATLAB and the possible states the position in the vector can take. XXXpw refers to any given pathway included in the model.

| Metabolite state         | position in vector | possible states                                                          |
|--------------------------|--------------------|--------------------------------------------------------------------------|
| metabolite name          | XXXpw{ : , 1 }     |                                                                          |
| presence                 | XXXpw{ : , 2 }     | (0) metabolite not present in system<br>(1) metabolite present in system |
| localization in the cell | XXXpw{ : , 3 }     | (1) in cytosol<br>(2) in nucleus                                         |

**Table S4. Metabolite component vector states:** All position in the vector for metabolite components. Their model identifier in MATLAB and the possible states the position in the vector can take. XXXpw refers to any given pathway included in the model.

| Rule description                                                                                                                               | Glucose | PubMed ID                   |
|------------------------------------------------------------------------------------------------------------------------------------------------|---------|-----------------------------|
| Hexotransporters import glucose to the cytosol, ATP is available in the cytosol                                                                | 1       | 9299703                     |
| Reg1 dephosphorylation by unknown Xxx3                                                                                                         | 0       |                             |
| Constitutive Snf1 phosphorylation by either Sak1, Elm1 or Tos3                                                                                 |         | 15831494, 17991748          |
| Dephosphorylation of Snf1 by Glc7 and phosphorylated Reg1                                                                                      |         | 15831494                    |
| SNF1 kinase complex beta and gamma subunits (Sip1, Sip2 or Gal83, and Snf4) are needed for active (phosphorylated) Snf1 and phosphorylate Mig1 |         | 2557546, 10990457           |
| Mig1 dephosphorylation by Glc7 and phosphorylated Reg1                                                                                         |         | 28854669                    |
| Unphosphorylated Mig1 is nuclear and DNA bound                                                                                                 |         | 9832517                     |
| Phosphorylated Mig1 is located in the cytosol                                                                                                  |         |                             |
| Ssn6 and Tup1 are recruited by DNA bound Mig1                                                                                                  |         | 7724528                     |
| Repression of the SUC, MAL and GAL genes by DNA bound Mig1, Ssn6 and Tup1                                                                      |         | 9832517, 9973625            |
| Rgt2 and Snf3 are glucose sensors and act through Yck1 or Yck2 recruitment to the membrane                                                     | 1       | 8901598, 14755054           |
| Yck1 or Yck2 close to the membrane are responsible for activation (phosphorylation) of Mth1 and Std1                                           |         | 14755054                    |
| Inactive (dephosphorylated) Mth1 or Std1 leads to hyperphosphorylation of Rgt1                                                                 |         | 12925759                    |
| Mth1 dephosphorylation by Psy2 and Pph3                                                                                                        | 0       | 24277933                    |
| Std1 and Rgt1 dephosphorylation by unknown Xxx1                                                                                                | 0       |                             |
| Dephosphorylation of Rgt1 returns its DNA binding capacity                                                                                     |         | 12861007                    |
| DNA bound and dephosphorylated Rgt1 recruits Ssn6 and Tup1                                                                                     |         |                             |
| Repression of HXK2 and HXTs by dephosphorylated Rgt1, Ssn6 and Tup1 at the DNA                                                                 |         | 7862149, 12527758, 15705057 |
| Hyperphosphorylated Rgt1 acts as an activator of HXTs                                                                                          |         | 12527758, 26205245          |
| Gpa2, the beta subunit of Gpr1, is associated with GTP when exposed to glucose                                                                 | 1       | 17983752                    |
| Gpa2-GTP interacts with Cyr1 at the membrane                                                                                                   |         | 17983752                    |
| Ras1 and Ras2 are associated with GTP by Cdc25 or Sdc25 if glucose is available intracellular                                                  | 1       | 9628870, 8206969            |
| Ras1-GTP and Ras2-GTP are anchored to the cytoplasm side of the cell membrane                                                                  |         | 8430318                     |
| Cyr1 localizes to the plasma membrane if there is Ras1-GTP or Ras2-GTP                                                                         |         | 1875942                     |
| Ras1 and Ras2 are GDP-loaded by Ira1 and Ira2 if glucose is depleted                                                                           | 0       | 15339905, 1668647           |

| Rule description                                                                                                           | Glucose | PubMed ID          |
|----------------------------------------------------------------------------------------------------------------------------|---------|--------------------|
| Glucose addition (ATP) and Cyr1 at the plasma membrane cause a spike in cAMP                                               | 1       | 9628870            |
| PKA complex is active if there is Bcy1 and Tpk1, Tpk2 or Tpk3 with cAMP                                                    |         |                    |
| Active PKA complex inactivates Rim15 by phosphorylation                                                                    |         | 16759348, 15661010 |
| Active PKA inactivates Yak1 by phosphorylation                                                                             |         | 21255108           |
| Activation (dephosphorylation) of Rim15 and Yak1 by unknown Xxx2                                                           | 0       |                    |
| Dephosphorylated Rim15 or Yak1 phosphorylates Msn2 and Msn4                                                                |         | 18793336, 24140345 |
| Active PKA complex represses nuclear localization of Msn2 and Msn4                                                         |         | 9472026, 16281053  |
| If PKA complex is inactive Msn2 and Msn4 are in the nucleus                                                                |         | 9472026, 16281053  |
| Inactive Rim15 deactivates Gis1 (connected to Igo1/2, Cdc55/Pph21/Tpd3 complex) by dephosphorylation and loss of DNA bound |         | 23273919           |
| Unknown Xxx4 dephosphorylates Msn2 and Msn4                                                                                | 1       |                    |
| Dephosphorylated Rim15 stimulates Gis1 by phosphorylation                                                                  |         | 15300954, 10835355 |
| Phosphorylated and nuclear Msn2 or Msn4 bind to the DNA and activate STRE genes                                            |         | 8650168, 8641288   |
| Phosphorylated and nuclear Gis1 bind to the DNA and activate PDS genes                                                     |         | 22363679           |

**Table S5. Rules:** All rules/conditions implemented in the model. The glucose column indicates if the glucose conditions (high = 1, low = 0) is directly involved in the reaction. Crosstalk is separately described in Table 2.

| Protein/Metabolite | Identifier in model | component type                 |
|--------------------|---------------------|--------------------------------|
| NH3                | Metabolites{4, : }  | Metabolite                     |
| Tor1               | TORpw{1, : }        | Protein                        |
| Tor2               | TORpw{2, : }        | Protein                        |
| Kog1               | TORpw{3, : }        | Protein                        |
| Lst8               | TORpw{4, : }        | Protein                        |
| Tco89              | TORpw{5, : }        | Protein                        |
| Tap42              | TORpw{6, : }        | Protein                        |
| PHPs               | TORpw{7, : }        | Multiple proteins (Php21/22/3) |
| Sit4               | TORpw{8, : }        | Protein                        |
| Tip41              | TORpw{9, : }        | Protein                        |
| Ure2               | TORpw{10, : }       | Protein                        |
| Gln3               | TORpw{11, : }       | Protein                        |
| Sch9               | TORpw{12, : }       | Protein                        |
| Par32              | TORpw{13, : }       | Protein                        |
| Npr2               | TORpw{14, : }       | Protein (also Npr3)            |
| Gtr1               | TORpw{15, : }       | Protein (also Gpr2)            |
| Xxx5               | MiscI{8, : }        | Protein                        |
| Xxx6               | MiscI{9, : }        | Protein                        |

**Table S6. TOR pathway components:** Table with all added components belonging to the TOR pathway, their model identifier in MATLAB and type of component.

## 1 TOR PATHWAY

| Rule description                                                                                                                      | Nitrogen | PubMed ID                    |
|---------------------------------------------------------------------------------------------------------------------------------------|----------|------------------------------|
| Par32 phosphorylation by Gtr1 and Npr2                                                                                                | 0        | 25085507                     |
| TOR complex formation (Tor1 or Tor2, dephosphorylated Kog1, Lst8, Tco89) TORC1                                                        | 1        | 22964838                     |
| Sch9 phosphorylation by active TORC1                                                                                                  |          | 22964838                     |
| Tap42 phosphorylation by active TORC1                                                                                                 |          | 22964838, 22174183           |
| Phosphorylated Tap42 recruits PHPs and Sit4 and is bound to the vacuolar membrane and can therefore not dephosphorylate Gln3 and Ure2 |          | 12820961, 25085507           |
| Sch9 dephosphorylation through inactive TORC1                                                                                         |          | 22964838                     |
| Tap42 dephosphorylation by inactive Sit4, PHPs and TOR complex                                                                        |          | 22964838, 22174183, 24738657 |
| Activation of unphosphorylated Tap42 and Sit4 and PHPs by release in the cytosol by phosphorylated Par32 and inactive TOR complex     |          | 12820961, 20093466           |
| Tip41 inhibits interaction of free cytosolic Tap42 with Sit4 and PHPs                                                                 |          | 11741537                     |
| Free cytosolic Sit4 and PHPs dephosphorylate Gln3 and Ure2                                                                            |          | 11741537, 10940301           |
| Dephosphorylated Gln3 moves to the nucleus                                                                                            |          | 22174183, 22964838           |
| Nuclear Gln3 expresses NCR gene                                                                                                       |          | 19104072, 20378536           |
| Active TORC1 phosphorylates Gln3 and Ure2 in the cytosol                                                                              |          | 10940301                     |

**Table S7. TOR pathway rules:** All added rules/conditions connected to the TOR pathway implemented in the model. The nitrogen column indicates if the nitrogen conditions (high = 1, low = 0) are directly involved in the reaction. Crosstalk is separately described in Table S8.

| #  | involved components       | description                                                                                  | source       |
|----|---------------------------|----------------------------------------------------------------------------------------------|--------------|
| 10 | Snf1, Gln3<br>Sch9, Par32 | Snf1 phosphorylates Gln3 and Kog1 and dephosphorylates Sch9 and Par32                        | [1, 8, 4, 3] |
| 11 | Xxx5                      | an unknown protein can dephosphorylate Par32 besides Snf1                                    | [3]          |
| 12 | Sch9, Tor, Rim 15, Msn2   | active Sch9 or Tor represses Rim15, Tor represses nuclear localization of Msn2 independently | [2, 7, 6]    |
| 13 | Sch9, Gis1                | active Sch9 phosphorylates Gis1 independent of Rim15                                         | [2]          |

**Table S8. TOR pathway related crosstalk:** Different types of TOR related crosstalk added to the model.

| # | involved components | gap description            | Added component |
|---|---------------------|----------------------------|-----------------|
| 6 | Par32               | Dephosphorylation of Par32 | Xxx5            |
| 7 | Kog1                | Dephosphorylation of Kog1  | Xxx6            |

**Table S9. TOR pathway gap filling steps:** Added TOR related gap filling parts in order to make the model switch between LSS states for "nitrogen" and "no nitrogen" conditions.

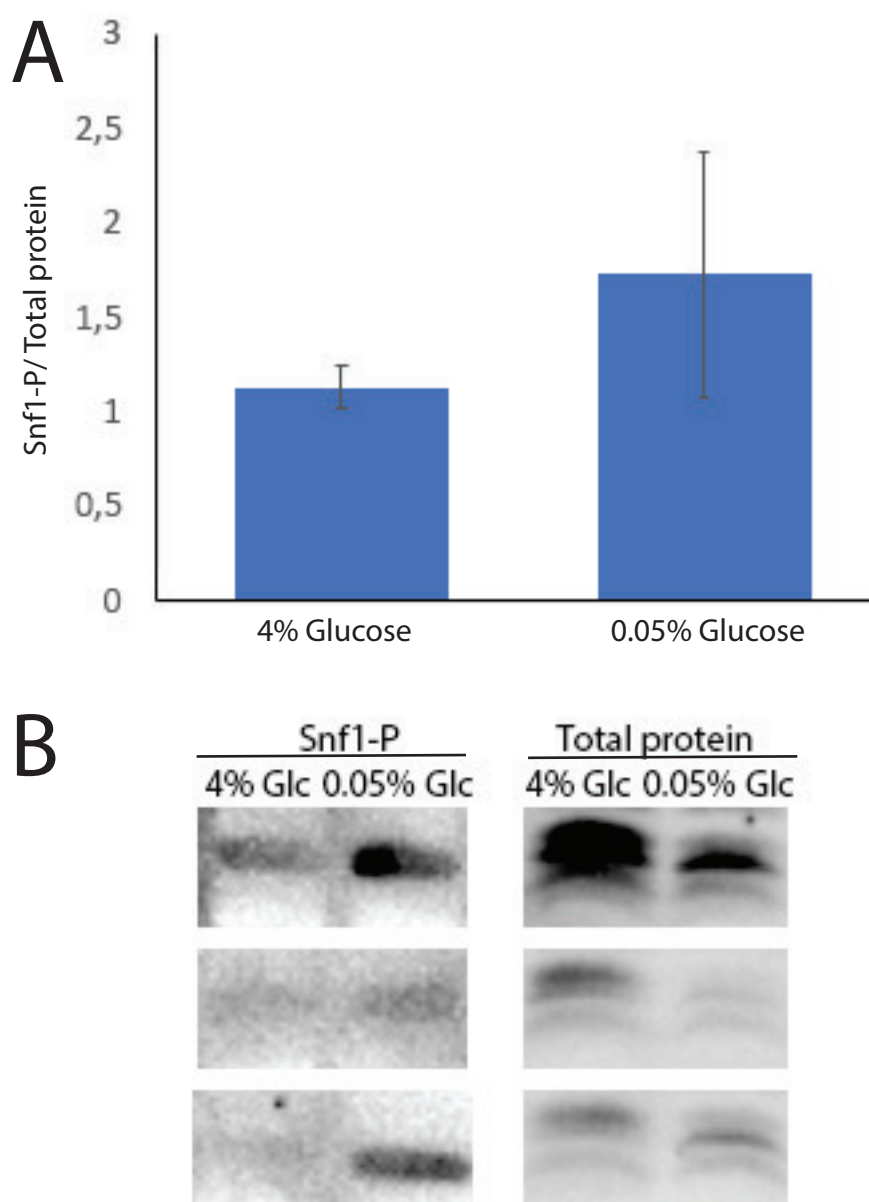

**Figure 1.** Snf1 phosphorylation in "glucose" or "no glucose conditions". **(A)** Snf1 phosphorylation 2 hours after cells were incubated with either 4% glucose or 0.05% as "glucose" and "no glucose" conditions, respectively. Measurement of Snf1 phosphorylation is given by the intensity of the Anti-Snf1-P antibody divided by the total protein. Average is for three experiments, error bars are standard error. **(B)** Western blots of all three experiments. Left side is the Anti-Snf1 antibody staining, right side is total protein in Glucose conditions (4% Glc) and Low glucose conditions (0.05% Glc).

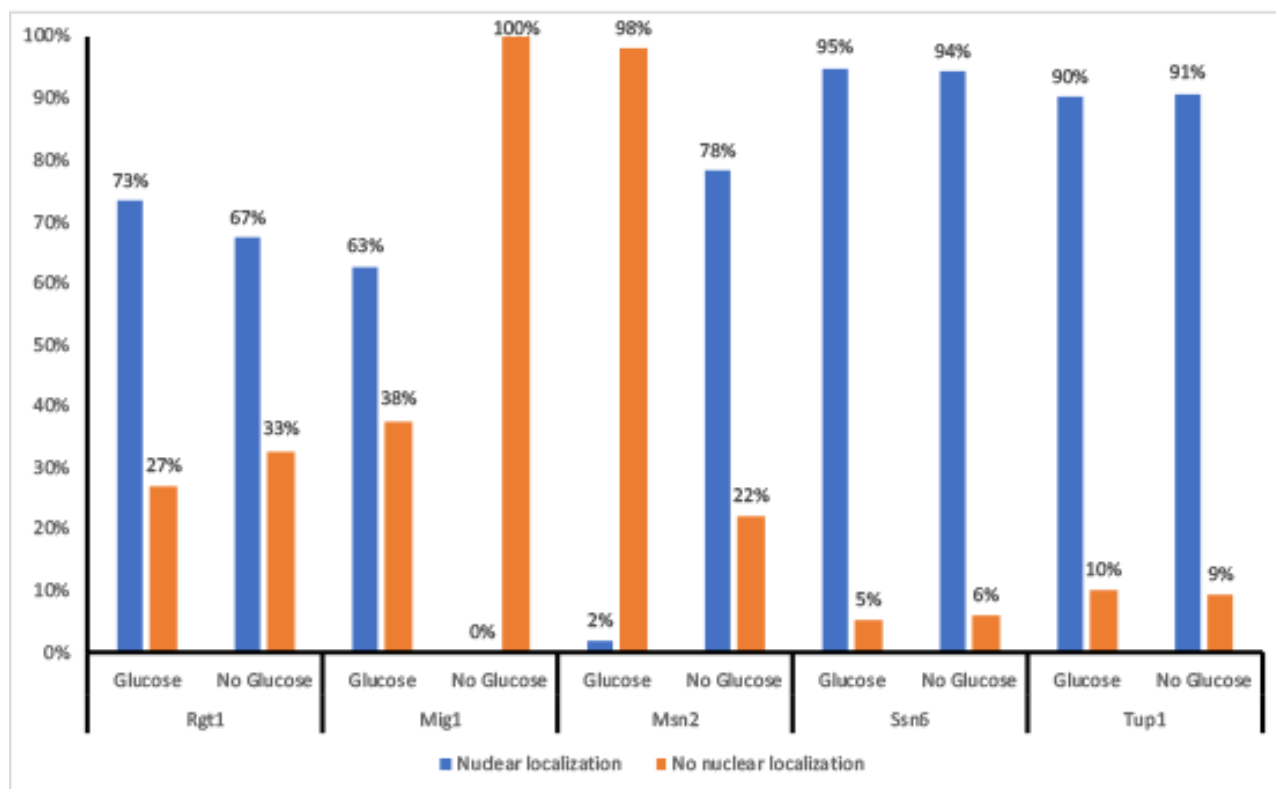

**Figure 2.** Distribution of nuclear localization determined from fluorescent data. Percentage of cells with nuclear localization (blue, left) and without nuclear localization (orange, right) of Rgt1, Mig1, Msn2, Ssn6 or Tup1. For each conditions for each strain between 32 - 62 cells were counted.

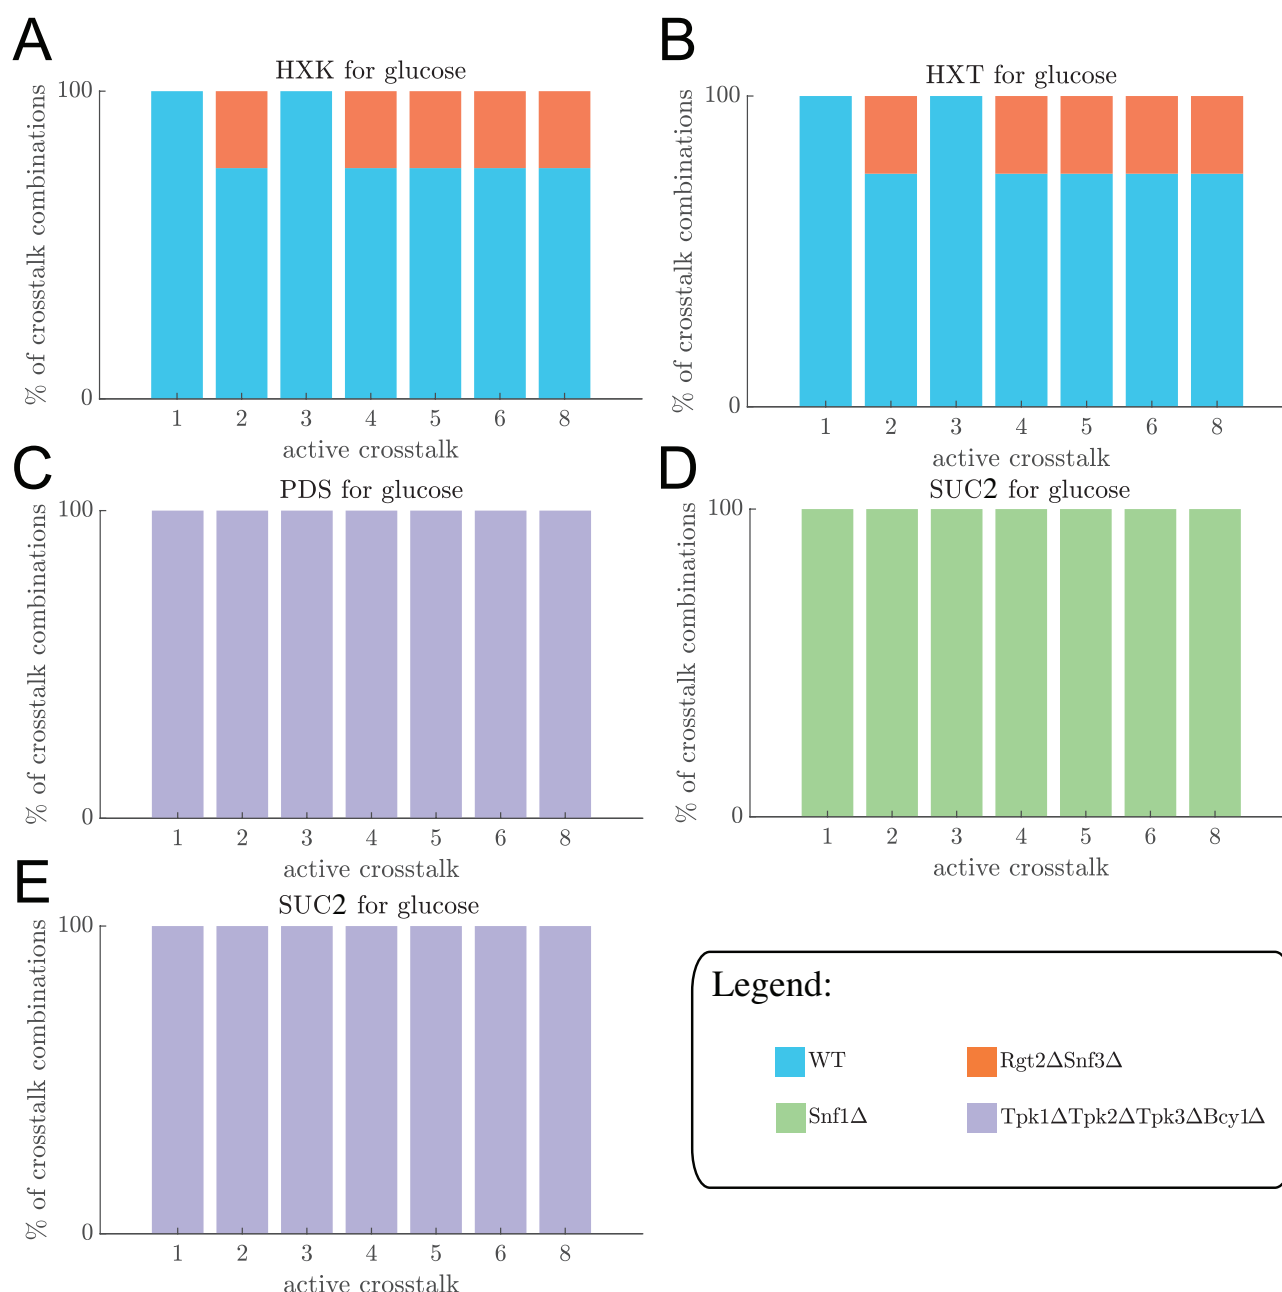

**Figure 3.** Crosstalk analysis of all possible combination of crosstalk 1-6 and 8 in cases of a model perturbation. Plot displays in which percentage of the cases a certain crosstalk (participating in the crosstalk combinations) mimicked the gene expression state for the WT-model or the perturbed model. (A) The HXK gene group for "glucose" conditions, WT vs. *rgt2Δsnf3Δ*. (B) The HXT gene group for "glucose" conditions, WT vs. *rgt2Δsnf3Δ*. (C) The PDS gene group for "glucose" conditions, WT vs. *tpk1Δtpk2Δtpk3Δbcy1Δ*. (D) The SUC2 gene group for "no glucose" conditions, WT vs. *Snf1Δ*. (E) The SUC2 gene group for "glucose" conditions, WT vs. *tpk1Δtpk2Δtpk3Δbcy1Δ*. SUC2 is the group name for the gene SUC2. HXT is the group name for genes HXT1, HXT2, HXT3 and HXT4. HXK is the name for the gene HXK2.

## REFERENCES

- [1] Bertram, P. G., Choi, J. H., Carvalho, J., Chan, T.-F., Ai, W., and Zheng, X. F. S. (2002). Convergence of TOR-nitrogen and Snf1-glucose signaling pathways onto Gln3. *Molecular and cellular biology* 22, 1246–52. doi:10.1007/978-3-319-43589-3\_7
- [2] Fabrizio, P., Pozza, F., Pletcher, S. D., Gendron, C. M., and Longo, V. D. (2001). Regulation of longevity and stress resistance by Sch9 in yeast. *Science (New York, N.Y.)* 292, 288–290. doi:10.1126/science.1059497
- [3] Hughes Hallett, J. E., Luo, X., and Capaldi, A. P. (2014). State transitions in the TORC1 signaling pathway and information processing in *Saccharomyces cerevisiae*. *Genetics* 198, 773–786. doi:10.1534/genetics.114.168369
- [4] Hughes Hallett, J. E., Luo, X., and Capaldi, A. P. (2015). Snf1/AMPK promotes the formation of Kog1/Raptor-bodies to increase the activation threshold of TORC1 in budding yeast. *eLife* 4. doi:10.7554/eLife.09181
- [5] Huh, W.-K., Falvo, J. V., Gerke, L. C., Carroll, A. S., Howson, R. W., Weissman, J. S., et al. (2003). Global analysis of protein localization in budding yeast. *Nature* 425, 686–691. doi:10.1038/nature02026
- [6] Pedruzzi, I., Dubouloz, F., Cameroni, E., Wanke, V., Roosen, J., Winderickx, J., et al. (2003). TOR and PKA signaling pathways converge on the protein kinase Rim15 to control entry into G0. *Molecular cell* 12, 1607–1613
- [7] Swinnen, E., Wanke, V., Roosen, J., Smets, B., Dubouloz, F., Pedruzzi, I., et al. (2006). Rim15 and the crossroads of nutrient signalling pathways in *Saccharomyces cerevisiae*. *Cell division* 1, 3. doi:10.1186/1747-1028-1-3
- [8] Tate, J. J., Rai, R., and Cooper, T. G. (2005). Methionine sulfoximine treatment and carbon starvation elicit Snf1-independent phosphorylation of the transcription activator Gln3 in *Saccharomyces cerevisiae*. *The Journal of biological chemistry* 280, 27195–204. doi:10.1074/jbc.M504052200
